# Supplementary material
Source: MDPI journal article supplement (https://www.mdpi.com/2304-6740/8/5/33)

# checkCIF/PLATON report

Structure factors have been supplied for datablock(s) MEM012\_130K

THIS REPORT IS FOR GUIDANCE ONLY. IF USED AS PART OF A REVIEW PROCEDURE FOR PUBLICATION, IT SHOULD NOT REPLACE THE EXPERTISE OF AN EXPERIENCED CRYSTALLOGRAPHIC REFEREE.

No syntax errors found.      CIF dictionary      Interpreting this report

## Datablock: MEM012\_130K

---

Bond precision:    C-C = 0.0070 Å

Wavelength=1.34143

Cell:                a=11.4363(6)                b=14.0871(6)                c=14.8030(7)  
                      alpha=89.133(4)            beta=68.457(4)            gamma=88.730(4)  
Temperature:        130 K

|                        | Calculated                     | Reported                       |
|------------------------|--------------------------------|--------------------------------|
| Volume                 | 2217.62(19)                    | 2217.62(19)                    |
| Space group            | P -1                           | P -1                           |
| Hall group             | : -P 1                         | -P 1                           |
| Moiety formula         | C50 H41 Cl Cu N2 O P2, F6<br>P | C50 H41 Cl1 Cu1 F6 N2 O1<br>P3 |
| Sum formula            | C50 H41 Cl Cu F6 N2 O P3       | C50 H41 Cl1 Cu1 F6 N2 O1<br>P3 |
| Mr                     | 991.76                         | 991.80                         |
| Dx, g cm <sup>-3</sup> | 1.485                          | 1.485                          |
| Z                      | 2                              | 2                              |
| Mu (mm <sup>-1</sup> ) | 4.068                          | 4.068                          |
| F000                   | 1016.0                         | 1016.0                         |
| F000'                  | 1014.75                        |                                |
| h,k,lmax               | 14,17,18                       | 14,17,18                       |
| Nref                   | 9159                           | 8675                           |
| Tmin,Tmax              |                                | 0.880,0.890                    |
| Tmin'                  |                                |                                |

Correction method= # Reported T Limits: Tmin=0.880 Tmax=0.890  
AbsCorr = SPHERE

Data completeness= 0.947

Theta(max)= 57.215

R(reflections)= 0.1112( 7747)

wR2(reflections)= wR= 0.0483(  
7713)

S = 0.994

Npar= 573

---

The following ALERTS were generated. Each ALERT has the format

**test-name\_ALERT\_alert-type\_alert-level.**

Click on the hyperlinks for more details of the test.

---

### ● Alert level C

ABSTY02\_ALERT\_1\_C An \_exptl\_absorpt\_correction\_type has been given without  
a literature citation. This should be contained in the  
\_exptl\_absorpt\_process\_details field.

Absorption correction given as sphere

|                                                                    |         |        |
|--------------------------------------------------------------------|---------|--------|
| PLAT082_ALERT_2_C High R1 Value .....                              | 0.11    | Report |
| PLAT250_ALERT_2_C Large U3/U1 Ratio for Average U(i,j) Tensor .... | 2.1     | Note   |
| PLAT260_ALERT_2_C Large Average Ueq of Residue Including P3        | 0.116   | Check  |
| PLAT341_ALERT_3_C Low Bond Precision on C-C Bonds .....            | 0.00698 | Ang.   |
| PLAT913_ALERT_3_C Missing # of Very Strong Reflections in FCF .... | 16      | Note   |
| PLAT918_ALERT_3_C Reflection(s) with I(obs) much Smaller I(calc) . | 4       | Check  |
| PLAT920_ALERT_1_C Theta(Max) in CIF and FCF Differ by .....        | 0.42    | Degree |
| PLAT939_ALERT_3_C Large Value of Not (SHELXL) Weight Optimized S . | 27.80   | Check  |

---

### ● Alert level G

ABSMU01\_ALERT\_1\_G Calculation of \_exptl\_absorpt\_correction\_mu  
not performed for this radiation type.

|                                                                    |        |        |
|--------------------------------------------------------------------|--------|--------|
| PLAT002_ALERT_2_G Number of Distance or Angle Restraints on AtSite | 4      | Note   |
| PLAT042_ALERT_1_G Calc. and Reported MoietyFormula Strings Differ  | Please | Check  |
| PLAT154_ALERT_1_G The s.u.'s on the Cell Angles are Equal ..(Note) | 0.004  | Degree |
| PLAT244_ALERT_4_G Low 'Solvent' Ueq as Compared to Neighbors of    | P3     | Check  |
| PLAT300_ALERT_4_G Atom Site Occupancy of Cl1 Constrained at        | 0.5    | Check  |
| PLAT300_ALERT_4_G Atom Site Occupancy of Cl2 Constrained at        | 0.5    | Check  |
| PLAT300_ALERT_4_G Atom Site Occupancy of Cl00 Constrained at       | 0.5    | Check  |
| PLAT300_ALERT_4_G Atom Site Occupancy of Cl01 Constrained at       | 0.5    | Check  |
| PLAT300_ALERT_4_G Atom Site Occupancy of H1001 Constrained at      | 0.5    | Check  |
| PLAT300_ALERT_4_G Atom Site Occupancy of H1002 Constrained at      | 0.5    | Check  |
| PLAT300_ALERT_4_G Atom Site Occupancy of H1003 Constrained at      | 0.5    | Check  |
| PLAT300_ALERT_4_G Atom Site Occupancy of H1011 Constrained at      | 0.5    | Check  |
| PLAT300_ALERT_4_G Atom Site Occupancy of H1012 Constrained at      | 0.5    | Check  |
| PLAT300_ALERT_4_G Atom Site Occupancy of H1013 Constrained at      | 0.5    | Check  |
| PLAT301_ALERT_3_G Main Residue Disorder .....(Resd 1 )             | 4%     | Note   |
| PLAT720_ALERT_4_G Number of Unusual/Non-Standard Labels .....      | 6      | Note   |
| PLAT790_ALERT_4_G Centre of Gravity not Within Unit Cell: Resd. #  | 2      | Note   |
| F6 P                                                               |        |        |
| PLAT808_ALERT_5_G No Parseable SHELXL Style Weighting Scheme Found | Please | Check  |
| PLAT860_ALERT_3_G Number of Least-Squares Restraints .....         | 2      | Note   |
| PLAT911_ALERT_3_G Missing FCF Refl Between Thmin & STh/L= 0.600    | 1415   | Report |
| PLAT912_ALERT_4_G Missing # of FCF Reflections Above STh/L= 0.600  | 496    | Note   |
| PLAT929_ALERT_5_G No Weight Pars,Obs and Calc R1,wR2,S not Checked | !      | Info   |
| PLAT961_ALERT_5_G Dataset Contains no Negative Intensities .....   | Please | Check  |
| PLAT984_ALERT_1_G The Cu-f'=-2.799 Deviates from the B&C-Value     | -2.797 | Ch     |

---

- 0 **ALERT level A** = Most likely a serious problem - resolve or explain  
0 **ALERT level B** = A potentially serious problem, consider carefully  
9 **ALERT level C** = Check. Ensure it is not caused by an omission or oversight  
25 **ALERT level G** = General information/check it is not something unexpected
- 6 ALERT type 1 CIF construction/syntax error, inconsistent or missing data  
4 ALERT type 2 Indicator that the structure model may be wrong or deficient  
7 ALERT type 3 Indicator that the structure quality may be low  
14 ALERT type 4 Improvement, methodology, query or suggestion  
3 ALERT type 5 Informative message, check

---

## Validation response form

Please find below a validation response form (VRF) that can be filled in and pasted into your CIF.

```
# start Validation Reply Form
_vrf_ABSTY02_MEM012_130K
;
PROBLEM: An _exptl_absorpt_correction_type has been given without
RESPONSE: ...
;
_vrf_PLAT082_MEM012_130K
;
PROBLEM: High R1 Value ..... 0.11 Report
RESPONSE: ...
;
_vrf_PLAT250_MEM012_130K
;
PROBLEM: Large U3/U1 Ratio for Average U(i,j) Tensor .... 2.1 Note
RESPONSE: ...
;
_vrf_PLAT260_MEM012_130K
;
PROBLEM: Large Average Ueq of Residue Including P3 0.116 Check
RESPONSE: ...
;
_vrf_PLAT341_MEM012_130K
;
PROBLEM: Low Bond Precision on C-C Bonds ..... 0.00698 Ang.
RESPONSE: ...
;
_vrf_PLAT913_MEM012_130K
;
PROBLEM: Missing # of Very Strong Reflections in FCF .... 16 Note
RESPONSE: ...
;
_vrf_PLAT918_MEM012_130K
;
PROBLEM: Reflection(s) with I(obs) much Smaller I(calc) . 4 Check
RESPONSE: ...
;
_vrf_PLAT920_MEM012_130K
;
PROBLEM: Theta(Max) in CIF and FCF Differ by ..... 0.42 Degree
RESPONSE: ...
;
_vrf_PLAT939_MEM012_130K
;
PROBLEM: Large Value of Not (SHELXL) Weight Optimized S . 27.80 Check
RESPONSE: ...
;
# end Validation Reply Form
```

---

It is advisable to attempt to resolve as many as possible of the alerts in all categories. Often the minor alerts point to easily fixed oversights, errors and omissions in your CIF or refinement strategy, so attention to these fine details can be worthwhile. In order to resolve some of the more serious problems it may be necessary to carry out additional measurements or structure refinements. However, the purpose of your study may justify the reported deviations and the more serious of these should normally be commented upon in the discussion or experimental section of a paper or in the "special\_details" fields of the CIF. checkCIF was carefully designed to identify outliers and unusual parameters, but every test has its limitations and alerts that are not important in a particular case may appear. Conversely, the absence of alerts does not guarantee there are no aspects of the results needing attention. It is up to the individual to critically assess their own results and, if necessary, seek expert advice.

### **Publication of your CIF in IUCr journals**

A basic structural check has been run on your CIF. These basic checks will be run on all CIFs submitted for publication in IUCr journals (*Acta Crystallographica*, *Journal of Applied Crystallography*, *Journal of Synchrotron Radiation*); however, if you intend to submit to *Acta Crystallographica Section C* or *E* or *IUCrData*, you should make sure that full publication checks are run on the final version of your CIF prior to submission.

### **Publication of your CIF in other journals**

Please refer to the *Notes for Authors* of the relevant journal for any special instructions relating to CIF submission.

---

**PLATON version of 19/10/2018; check.def file version of 15/10/2018**

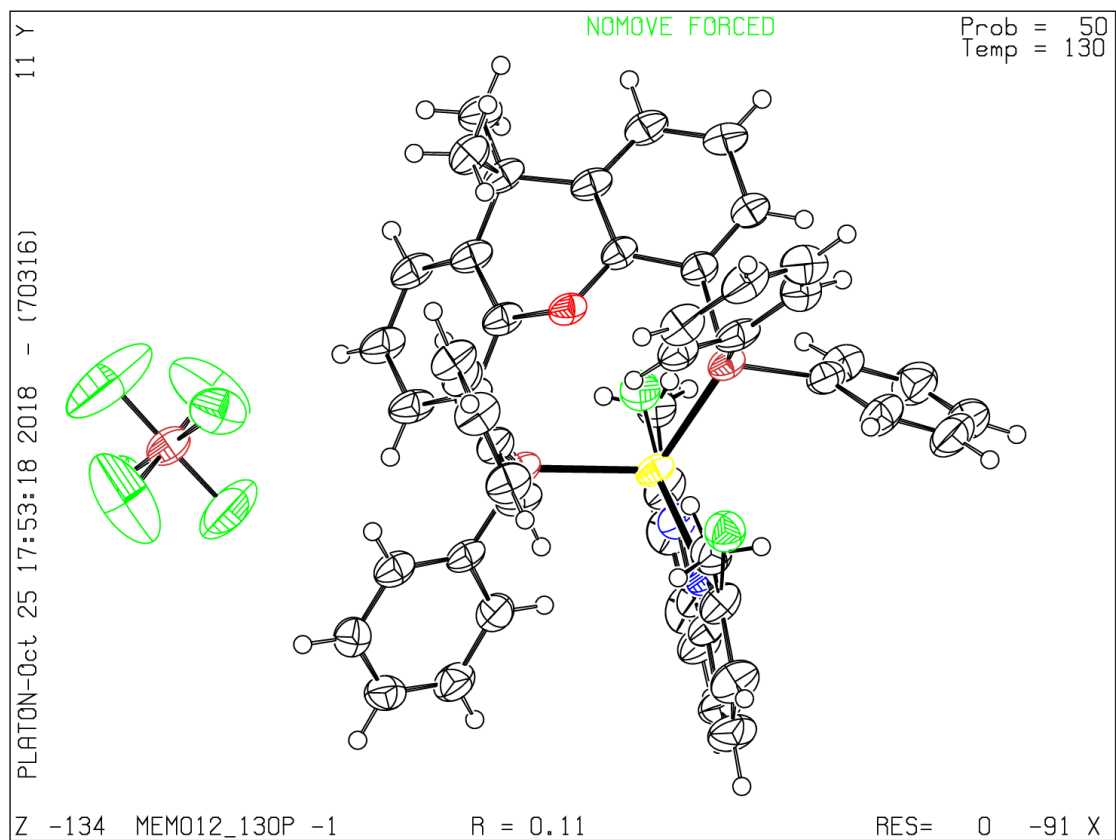

Supplement: s1 [file s1]
