# Supplementary material
Source: MDPI journal article supplement (https://www.mdpi.com/2304-6740/8/5/33)
Supplement: s1 [file s1]

# Supplementary Materials: Chimera Diimine Ligands in Emissive [Cu(P<sup>^</sup>P)(N<sup>^</sup>N)][PF<sub>6</sub>] Complexes

Marco Meyer, Fabian Brunner, Alessandro Prescimone, Edwin C. Constable and Catherine E. Housecroft \*

## Table of contents

- Figure S1. The ESI MS of 6-Cl-6'-Mebpy.
- Figure S2. <sup>1</sup>H NMR spectrum (500 MHz, CDCl<sub>3</sub>, 298 K) of 6-Cl-6'-Mebpy.
- Figure S3. HMQC spectrum (500 MHz <sup>1</sup>H, 126 MHz <sup>13</sup>C{<sup>1</sup>H}, CDCl<sub>3</sub>, 298 K) of 6-Cl-6'-Mebpy.
- Figure S4. HMBC spectrum (500 MHz <sup>1</sup>H, 126 MHz <sup>13</sup>C{<sup>1</sup>H}, CDCl<sub>3</sub>, 298 K) of 6-Cl-6'-Mebpy.
- Figure S5. The ESI mass spectrum of [Cu(POP)(6-Cl-6'-Mebpy)][PF<sub>6</sub>].
- Figure S6. The ESI mass spectrum of [Cu(xantphos)(6-Cl-6'-Mebpy)][PF<sub>6</sub>].
- Figure S7. Methyl region of the <sup>1</sup>H NMR spectrum of [Cu(xantphos)(6-Cl-6'-Mebpy)][PF<sub>6</sub>] (500 MHz, 298 K, acetone-*d*<sub>6</sub>).
- Figure S8. The aromatic region of the HMQC spectrum (500 MHz <sup>1</sup>H, 126 MHz <sup>13</sup>C{<sup>1</sup>H}, acetone-*d*<sub>6</sub>, 298 K) of [Cu(POP)(6-Cl-6'-Mebpy)][PF<sub>6</sub>].
- Figure S9. Part of the HMBC spectrum (500 MHz <sup>1</sup>H, 126 MHz <sup>13</sup>C{<sup>1</sup>H}, acetone-*d*<sub>6</sub>, 298 K) of [Cu(POP)(6-Cl-6'-Mebpy)][PF<sub>6</sub>].
- Figure S10. The aromatic region of the HMQC spectrum (500 MHz <sup>1</sup>H, 126 MHz <sup>13</sup>C{<sup>1</sup>H}, acetone-*d*<sub>6</sub>, 298 K) of [Cu(xantphos)(6-Cl-6'-Mebpy)][PF<sub>6</sub>].
- Figure S11. Part of the HMBC spectrum (500 MHz <sup>1</sup>H, 126 MHz <sup>13</sup>C{<sup>1</sup>H}, acetone-*d*<sub>6</sub>, 298 K) of [Cu(xantphos)(6-Cl-6'-Mebpy)][PF<sub>6</sub>].
- Figure S12. ORTEP representation of the structure of the [Cu(POP)(6-Cl-6'-Mebpy)]<sup>+</sup> cation in [Cu(POP)(6-Cl-6'-Mebpy)][PF<sub>6</sub>].
- Figure S13. The disordered structure of the [Cu(POP)(6-Cl-6'-Mebpy)]<sup>+</sup> cation in [Cu(POP)(6-Cl-6'-Mebpy)][PF<sub>6</sub>].
- Figure S14. ORTEP representation of the structure of the [Cu(xantphos)(6-Cl-6'-Mebpy)]<sup>+</sup> cation in [Cu(xantphos)(6-Cl-6'-Mebpy)][PF<sub>6</sub>].
- Figure S15. Three consecutive scans in the cyclic voltammogram of [Cu(xantphos)(6-Cl-6'-Mebpy)][PF<sub>6</sub>] in CH<sub>2</sub>Cl<sub>2</sub>.
- Figure S16. Three consecutive scans in the cyclic voltammogram of [Cu(POP)(6-Cl-6'-Mebpy)][PF<sub>6</sub>] in CH<sub>2</sub>Cl<sub>2</sub>.

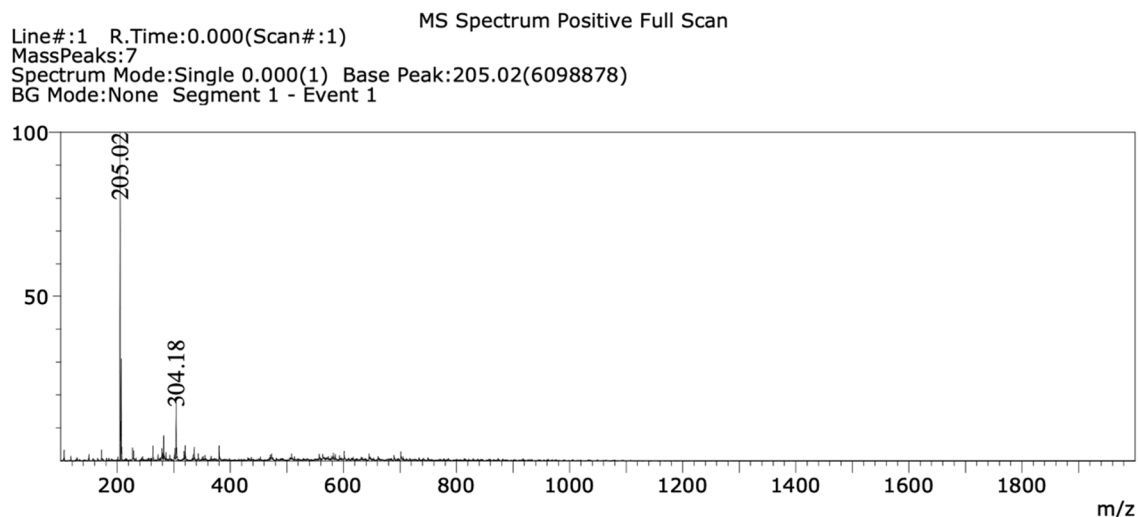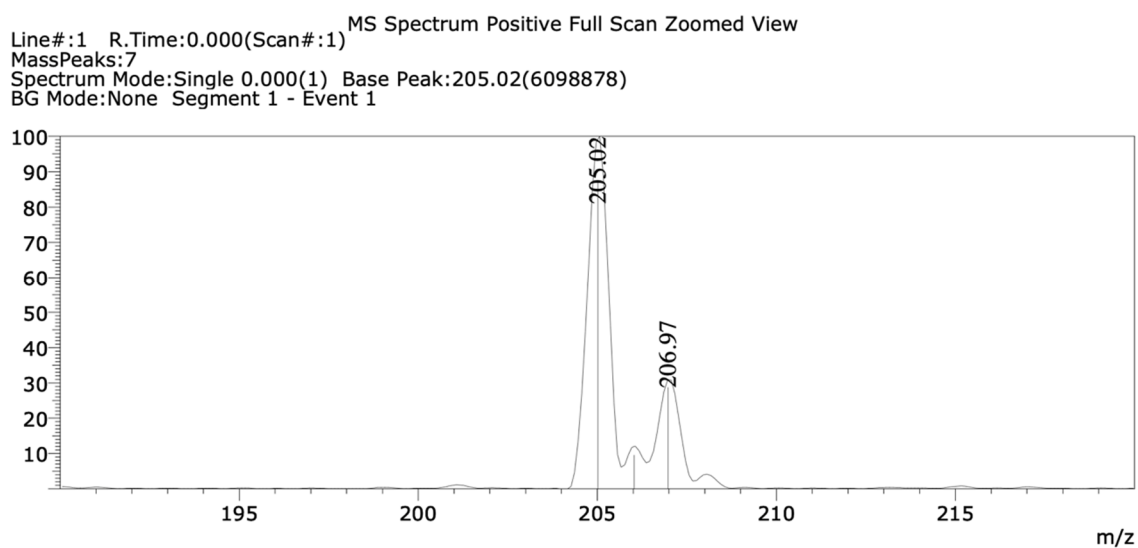

Figure S1. The ESI MS of 6-Cl-6'-Mebpy.

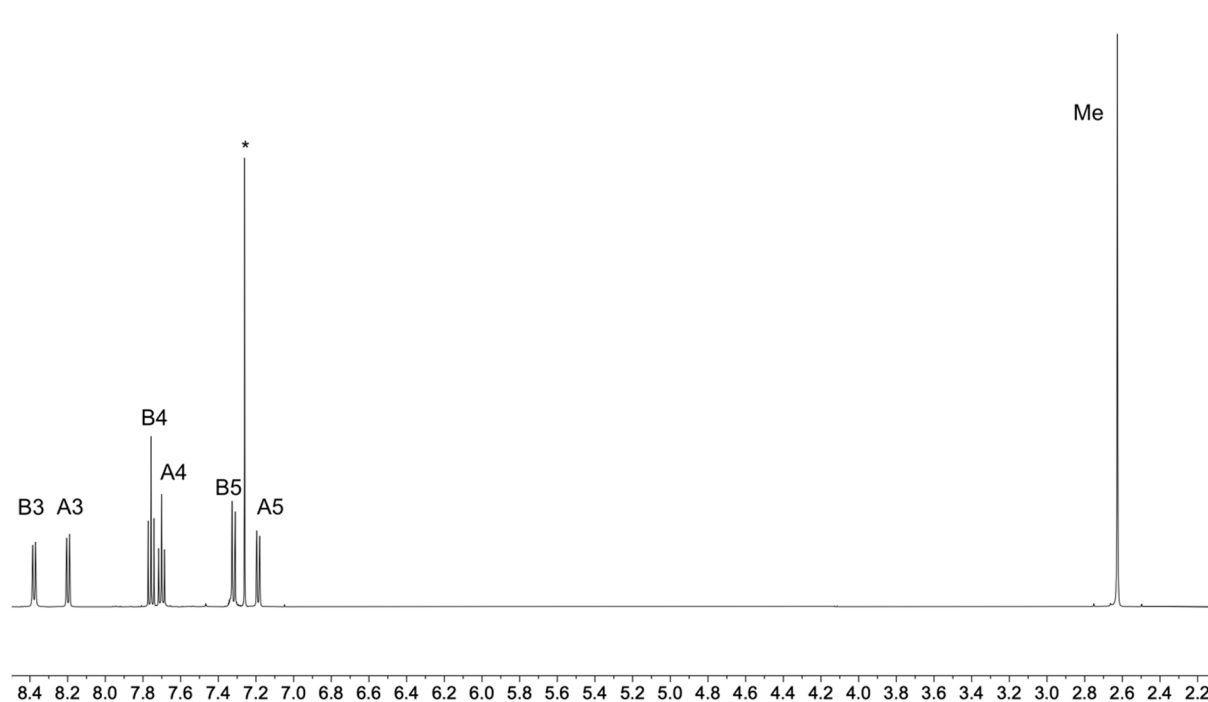

Figure S2.  $^1\text{H}$  NMR spectrum (500 MHz,  $\text{CDCl}_3$ , 298 K) of 6-Cl-6'-Mebpy. Scale:  $\delta$ /ppm. \* = residual  $\text{CHCl}_3$ .

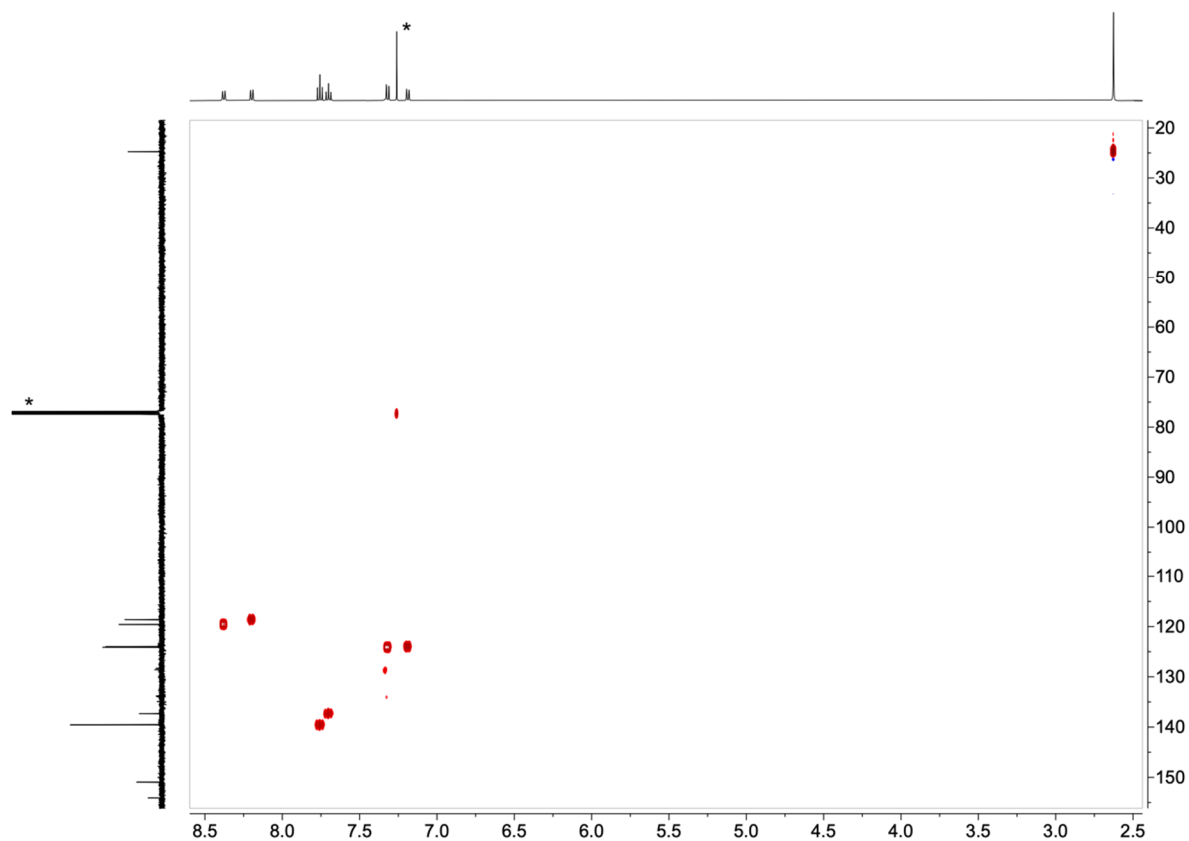

Figure S3. HMQC spectrum (500 MHz  $^1\text{H}$ , 126 MHz  $^{13}\text{C}\{^1\text{H}\}$ ,  $\text{CDCl}_3$ , 298 K) of 6-Cl-6'-Mebpy. Scale:  $\delta$ /ppm. \* = residual  $\text{CHCl}_3$  (in  $^1\text{H}$ ) or  $\text{CDCl}_3$  (in  $^{13}\text{C}\{^1\text{H}\}$ ).

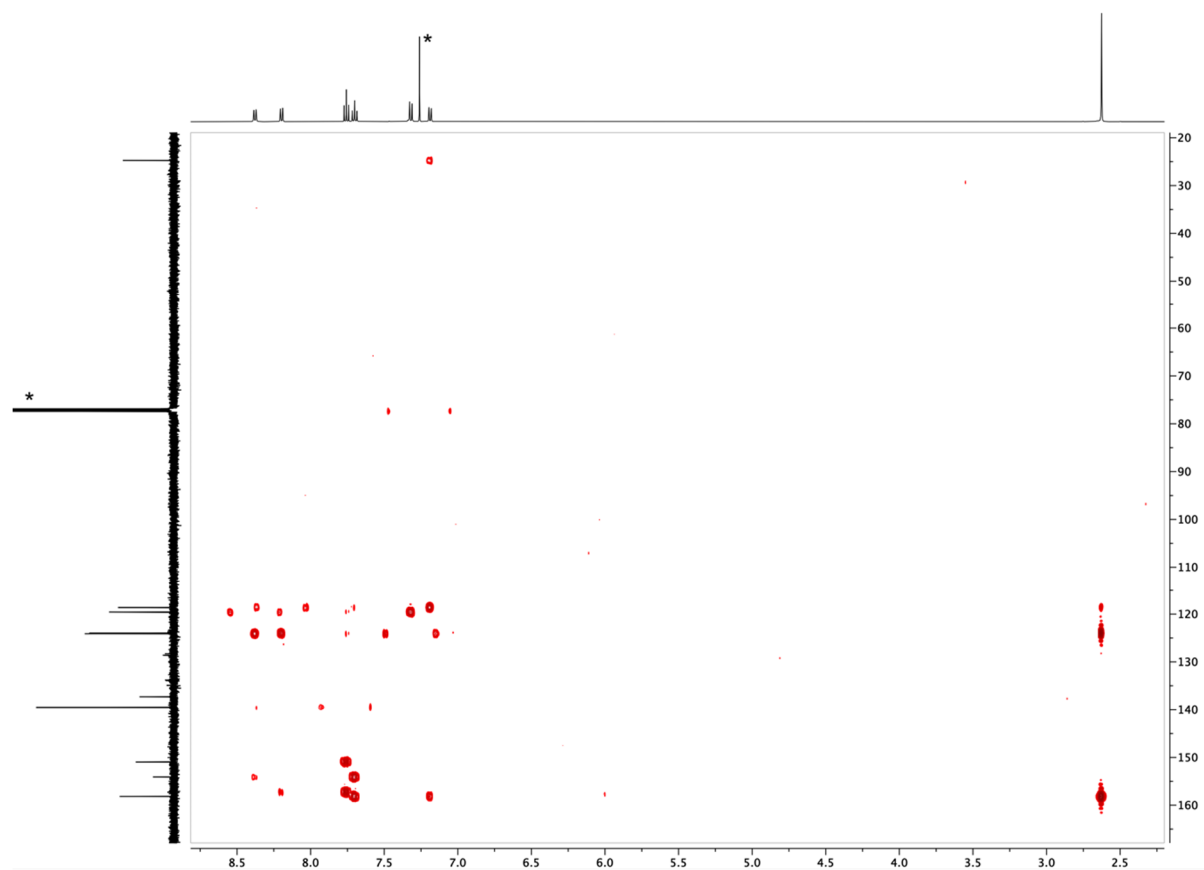

Figure S4. HMBC spectrum (500 MHz  $^1\text{H}$ , 126 MHz  $^{13}\text{C}\{^1\text{H}\}$ ,  $\text{CDCl}_3$ , 298 K) of 6-Cl-6'-Mebpy. Scale:  $\delta$ /ppm. \* = residual  $\text{CHCl}_3$  (in  $^1\text{H}$ ) or  $\text{CDCl}_3$  (in  $^{13}\text{C}\{^1\text{H}\}$ ).

Line#:1 R.Time:0.000(Scan#:1)  
MassPeaks:10  
Spectrum Mode:Single 0.000(1) Base Peak:601.09(9464781)  
BG Mode:None Segment 1 - Event 1

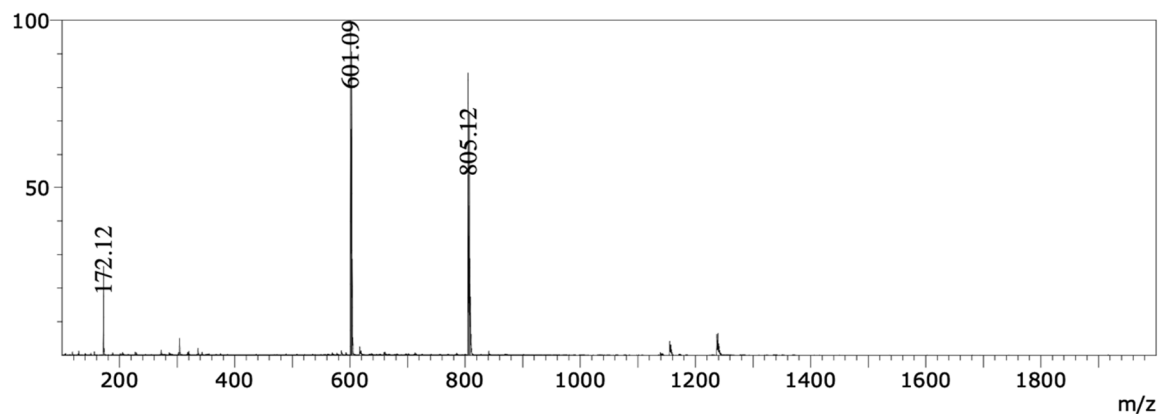

Line#:1 R.Time:0.000(Scan#:1)  
MassPeaks:10  
Spectrum Mode:Single 0.000(1) Base Peak:601.09(9464781)  
BG Mode:None Segment 1 - Event 1

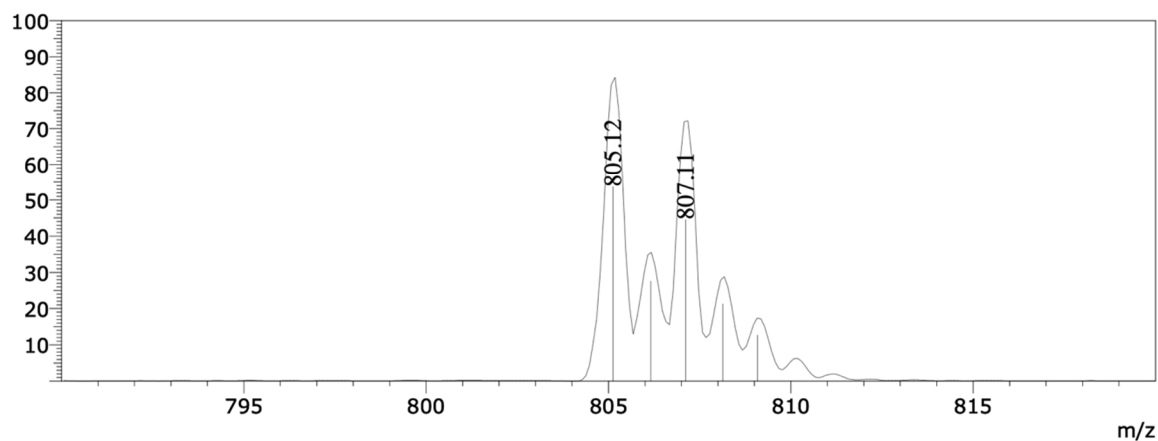

Figure S5. The ESI mass spectrum of  $[\text{Cu}(\text{POP})(6\text{-Cl-6'-Mebpy})][\text{PF}_6]$ .

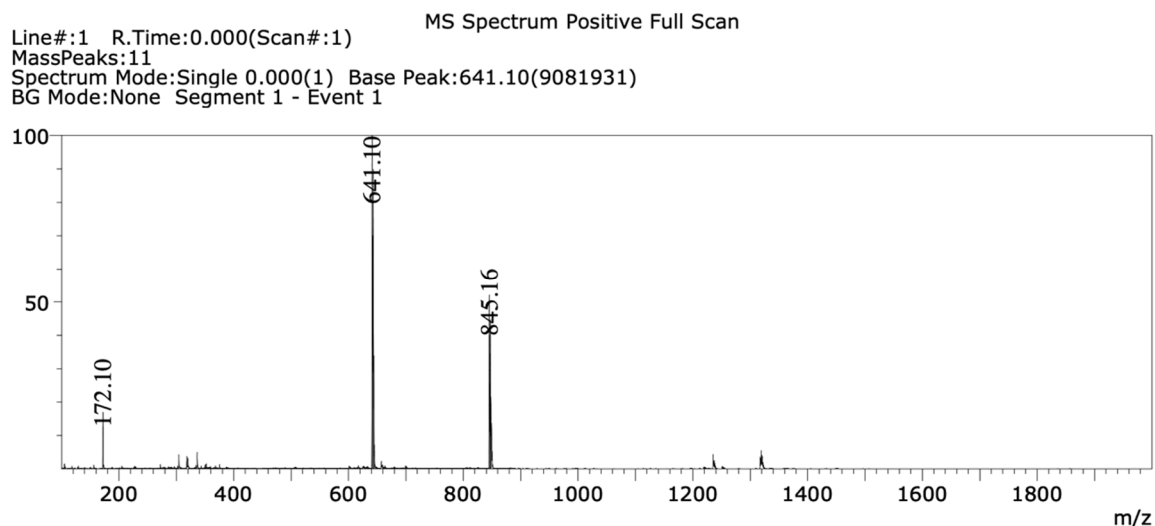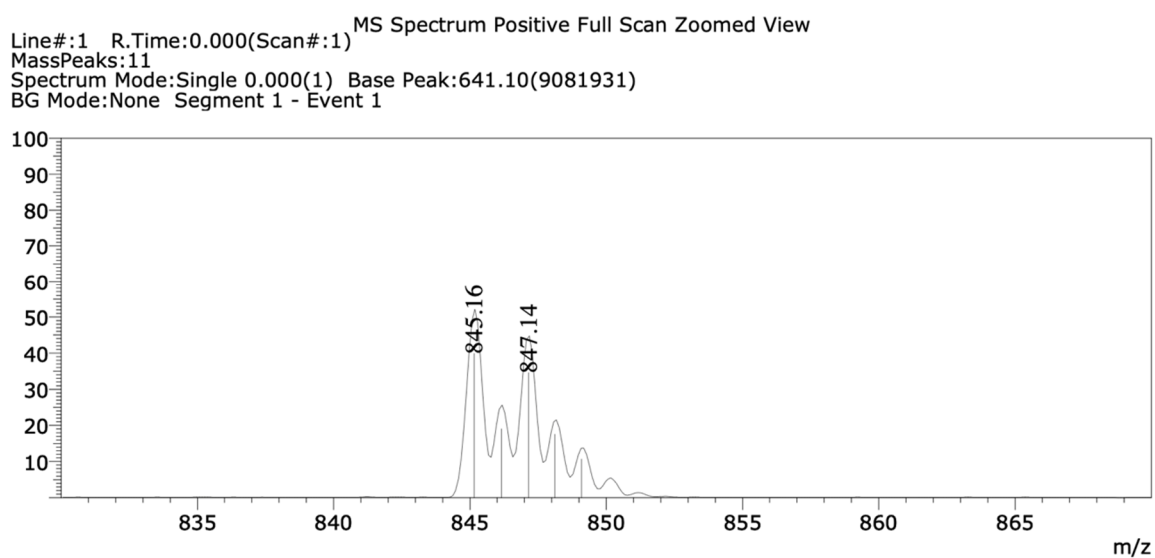

Figure S6. The ESI mass spectrum of  $[\text{Cu}(\text{xantphos})(6\text{-Cl-}6'\text{-Mebpy})][\text{PF}_6]$ .

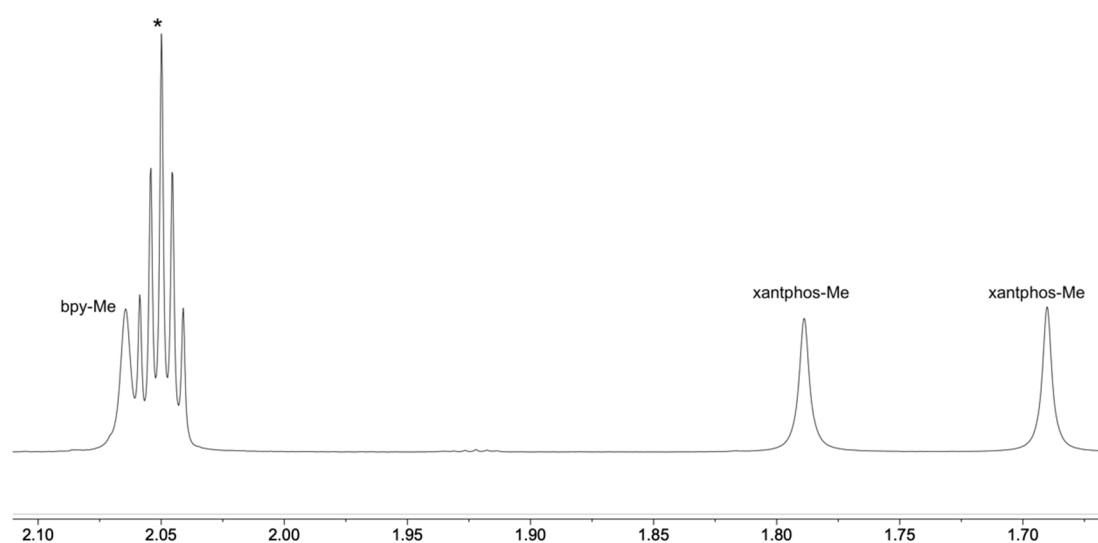

Figure S7. Methyl region of the  $^1\text{H}$  NMR spectrum of  $[\text{Cu}(\text{xantphos})(6\text{-Cl-}6'\text{-Mebpy})][\text{PF}_6]$  (500 MHz, 298 K, acetone- $d_6$ ). \* = residual acetone- $d_5$ .

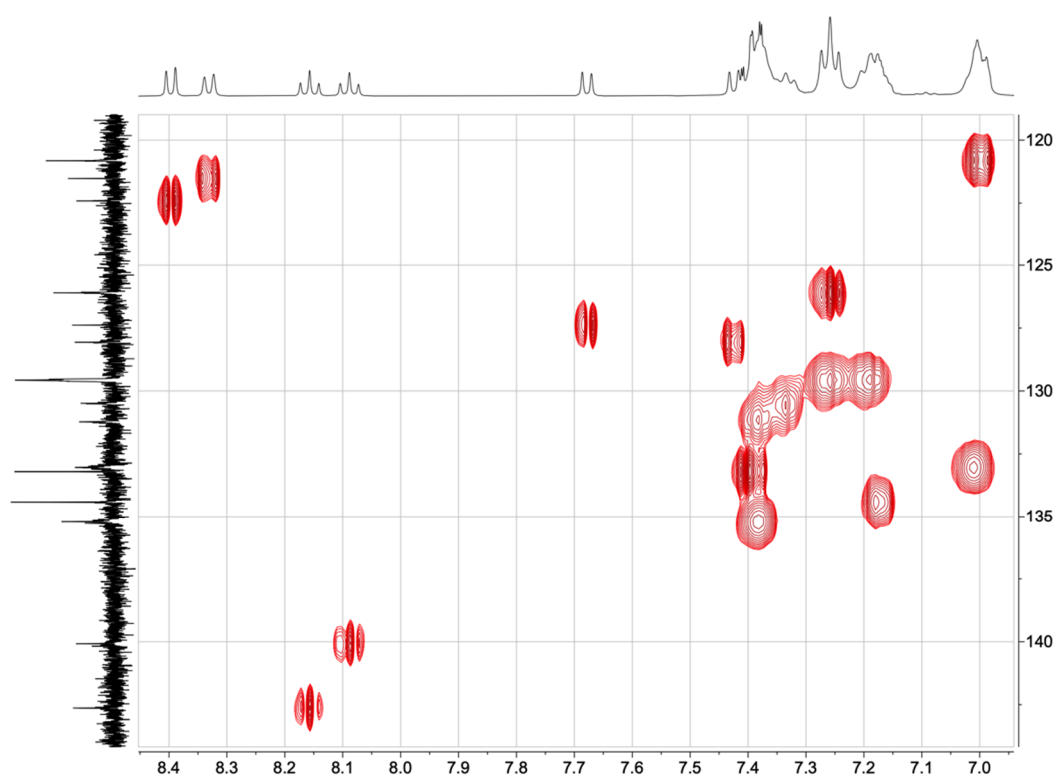

Figure S8. The aromatic region of the HMQC spectrum (500 MHz  $^1\text{H}$ , 126 MHz  $^{13}\text{C}\{^1\text{H}\}$ , acetone- $d_6$ , 298 K) of  $[\text{Cu}(\text{POP})(6\text{-Cl-6'-Mebpy})][\text{PF}_6]$ . Scale:  $\delta$  / ppm.

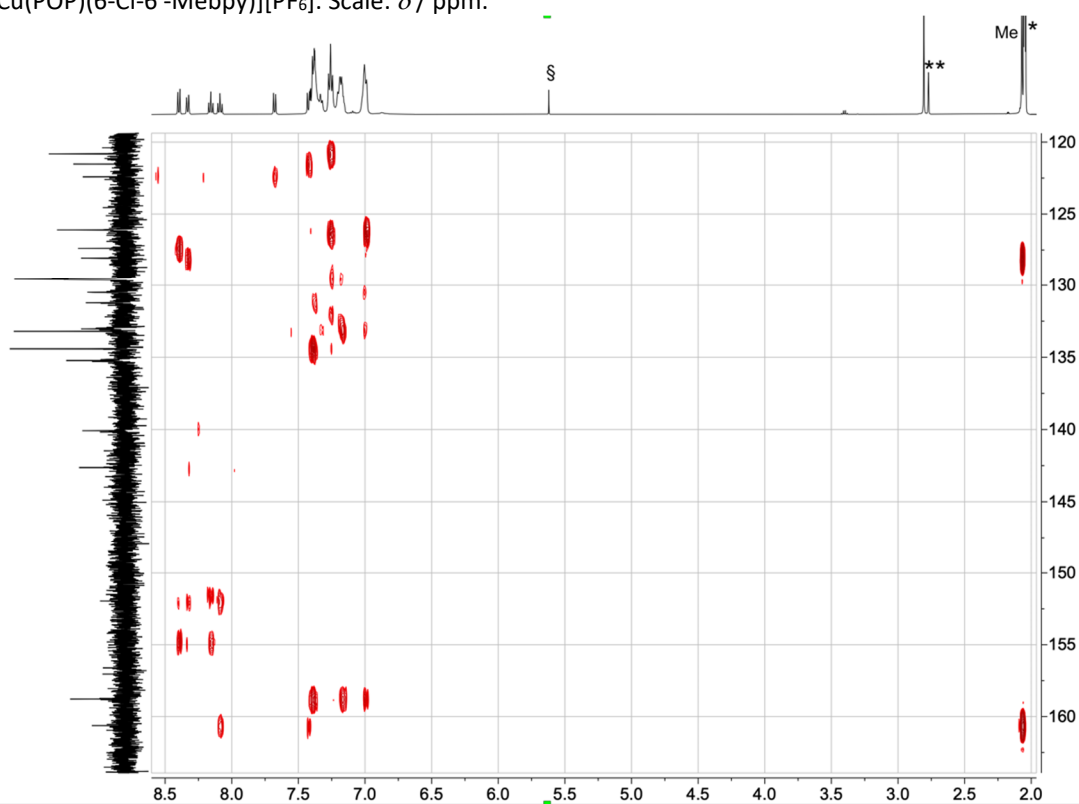

Figure S9. Part of the HMBC spectrum (500 MHz  $^1\text{H}$ , 126 MHz  $^{13}\text{C}\{^1\text{H}\}$ , acetone- $d_6$ , 298 K) of  $[\text{Cu}(\text{POP})(6\text{-Cl-6'-Mebpy})][\text{PF}_6]$ . Scale:  $\delta$  / ppm. \* = residual acetone- $d_5$ ; \*\* =  $\text{H}_2\text{O}$  and  $\text{HOD}$ ; § =  $\text{CH}_2\text{Cl}_2$ .

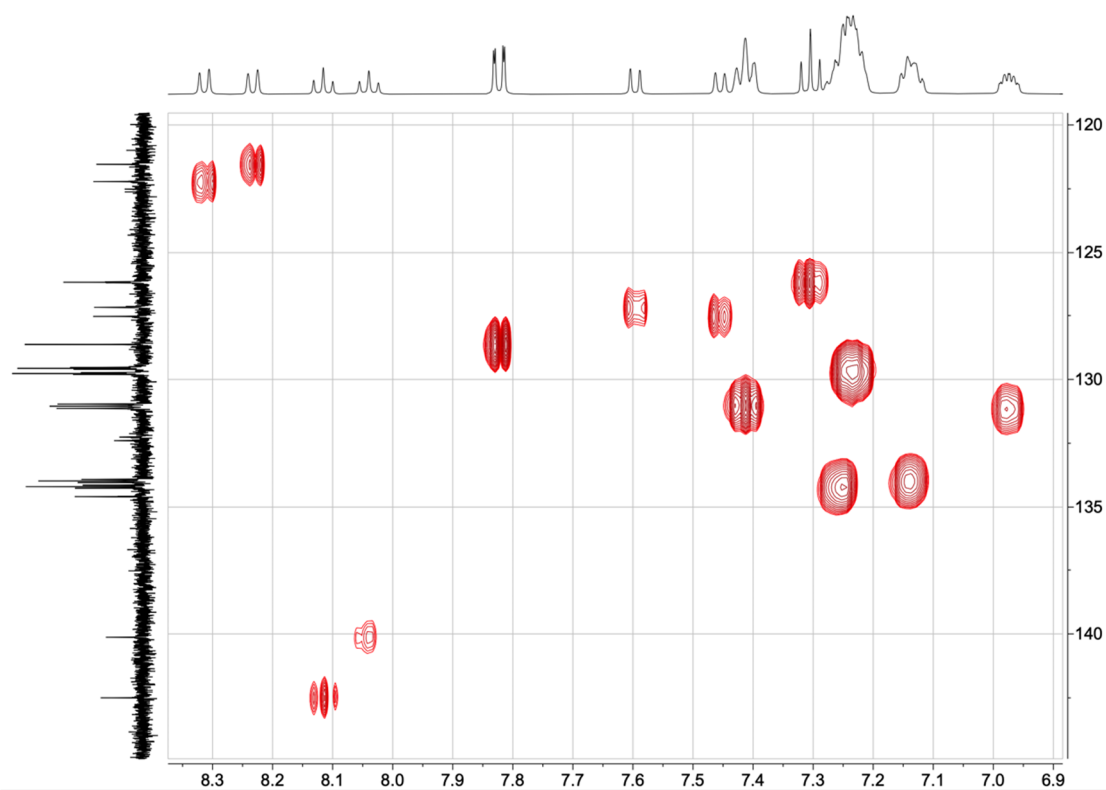

Figure S10. The aromatic region of the HMQC spectrum (500 MHz  $^1\text{H}$ , 126 MHz  $^{13}\text{C}\{^1\text{H}\}$ , acetone- $d_6$ , 298 K) of  $[\text{Cu}(\text{xantphos})(6\text{-Cl-6'-Mebpy})][\text{PF}_6]$ . Scale:  $\delta$  / ppm.

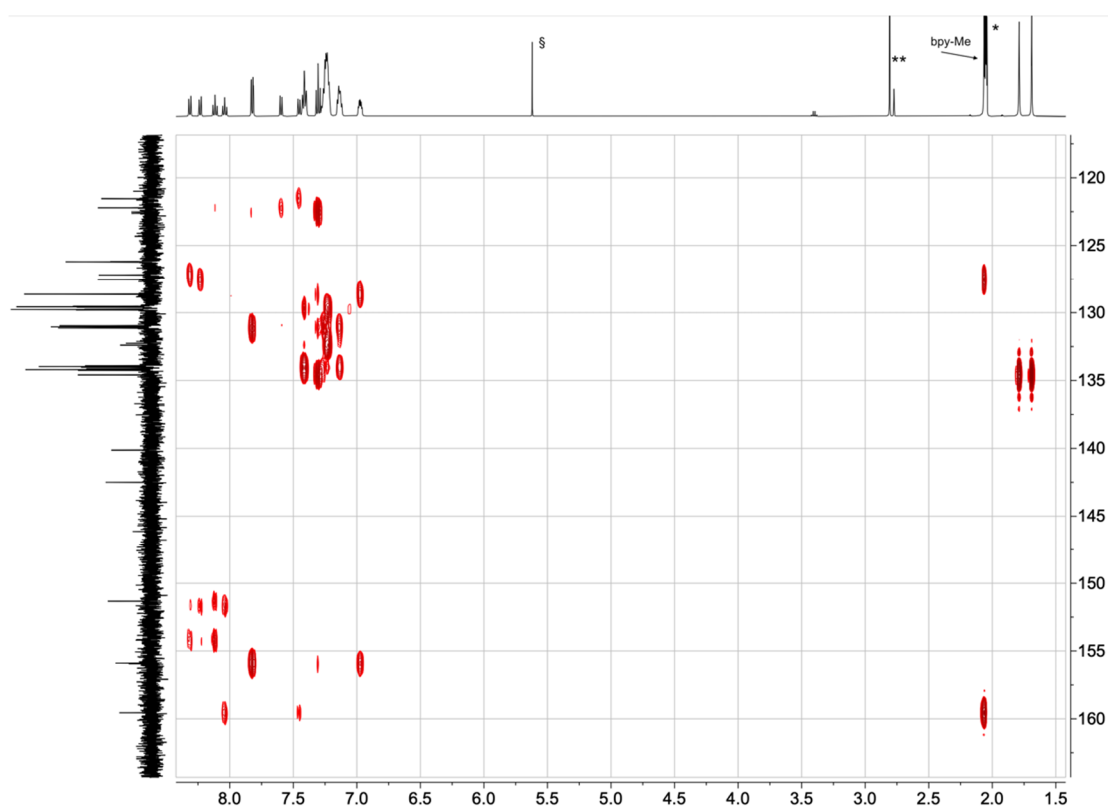

Figure S11. Part of the HMBC spectrum (500 MHz  $^1\text{H}$ , 126 MHz  $^{13}\text{C}\{^1\text{H}\}$ , acetone- $d_6$ , 298 K) of  $[\text{Cu}(\text{xantphos})(6\text{-Cl-6'-Mebpy})][\text{PF}_6]$ . Scale:  $\delta$  / ppm. \* = residual acetone- $d_5$ ; \*\* =  $\text{H}_2\text{O}$  and HOD; § =  $\text{CH}_2\text{Cl}_2$ .



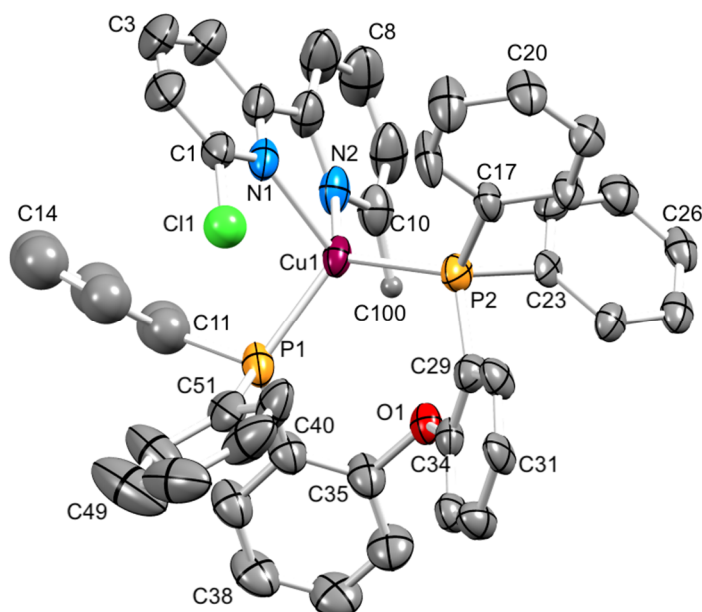

Figure S12. ORTEP representation of the structure of the  $[\text{Cu}(\text{POP})(6\text{-Cl-6'-Mebpy})]^+$  cation in  $[\text{Cu}(\text{POP})(6\text{-Cl-6'-Mebpy})][\text{PF}_6]$ . One set of partial occupancy sites is shown (see Figure S13). Ellipsoids are plotted at a 40% probability level and H atoms are omitted. The phenyl ring with C11 was refined isotropically as it was not possible to identify two distinct orientations; atom C100 of the methyl group was also refined isotropically.

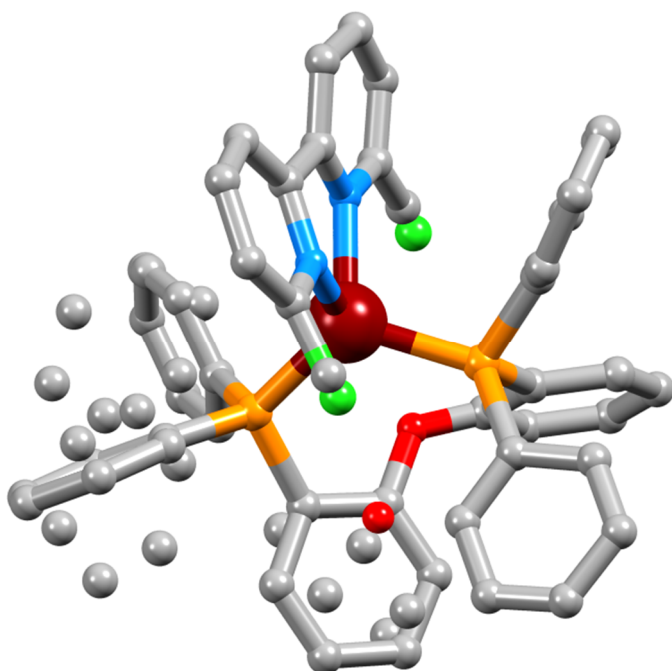

Figure S13. The disordered structure of the  $[\text{Cu}(\text{POP})(6\text{-Cl-6'-Mebpy})]^+$  cation in  $[\text{Cu}(\text{POP})(6\text{-Cl-6'-Mebpy})][\text{PF}_6]$ . Each partial occupancy site was modelled with a 50% occupancy.

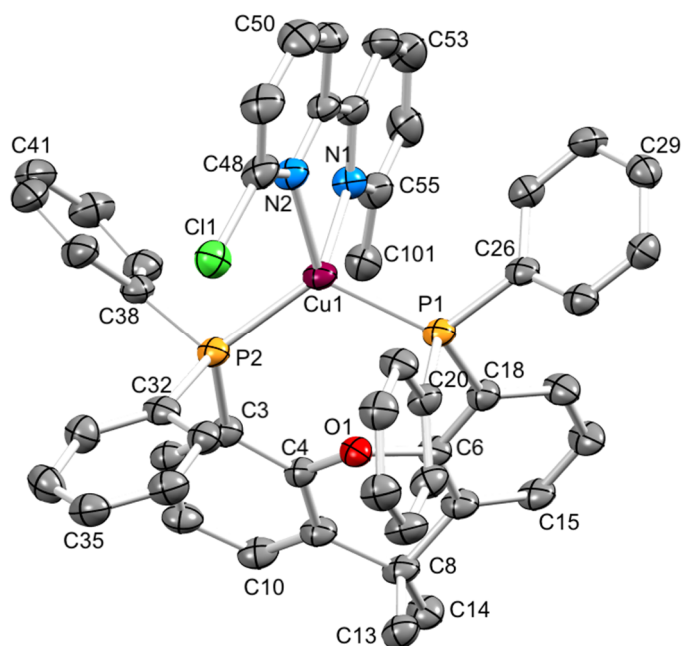

Figure S14. ORTEP representation of the structure of the  $[\text{Cu}(\text{xantphos})(6\text{-Cl-6'-Mebpy})]^+$  cation in  $[\text{Cu}(\text{xantphos})(6\text{-Cl-6'-Mebpy})][\text{PF}_6]$ . Ellipsoids are plotted at a 40% probability level and H atoms are omitted. The Cl/Me positions are disordered (modelled with 50% occupancies) and one site for the 6-Cl-6'-Mebpy is shown.

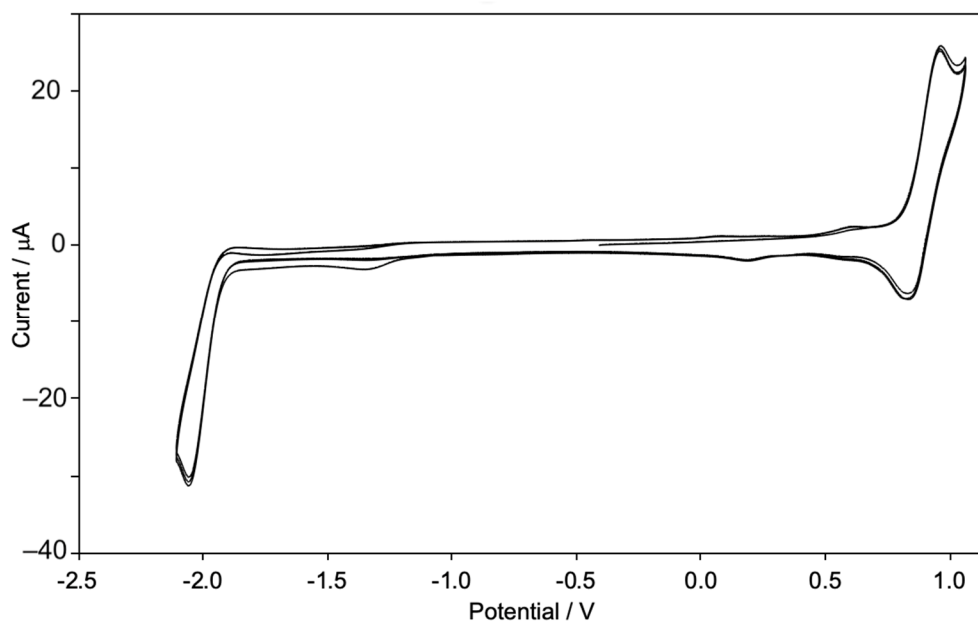

Figure S15. Three consecutive scans in the cyclic voltammogram of  $[\text{Cu}(\text{xantphos})(6\text{-Cl-6'-Mebpy})][\text{PF}_6]$  in  $\text{CH}_2\text{Cl}_2$  solution (ca.  $10^{-4} \text{ mol dm}^{-3}$ ) with  $[\text{nBu}_4\text{N}][\text{PF}_6]$  as supporting electrolyte and a scan rate of  $0.1 \text{ V s}^{-1}$  (referenced to internal  $\text{Fc}/\text{Fc}^+ = 0.0 \text{ V}$ ).

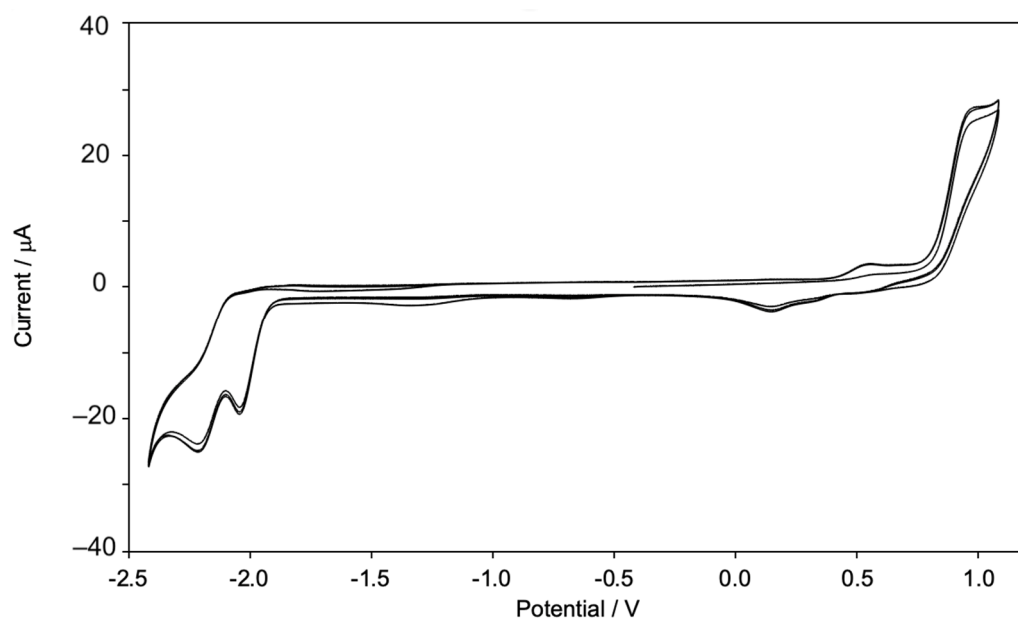

Figure S16. Three consecutive scans in the cyclic voltammogram of  $[\text{Cu}(\text{POP})(6\text{-Cl-6'-Mebpy})][\text{PF}_6]$  in  $\text{CH}_2\text{Cl}_2$  solution (ca.  $10^{-4} \text{ mol dm}^{-3}$ ) with  $[\text{nBu}_4\text{N}][\text{PF}_6]$  as supporting electrolyte and a scan rate of  $0.1 \text{ V s}^{-1}$  (referenced to internal  $\text{Fc}/\text{Fc}^+ = 0.0 \text{ V}$ ).
